# Supplementary material for: Role of the Transcription Factor Yin Yang 1 and Its Selectively Identified Target Survivin in High-Grade B-Cells Non-Hodgkin Lymphomas: Potential Diagnostic and Therapeutic Targets
Source: PubMed Central journal article supplement (PMC7504013; doi:10.3390/ijms21176446), 2020-09-03
Supplement: ijms-21-06446-s001.pdf [file ijms-21-06446-s001.pdf]

**Figure S1.** Whole Transcription Factors ChIP-seq binding-clusters within BIRC5 promoter, according to ENCODE. Gray boxes identify each peak cluster relative to transcription factors occupancy within BIRC5 promoter. The length of each box indicates the region of binding within the promoter, while the gray-scale of the boxes is proportional to the strength of the binding to the promoter per each identified transcription factor. Near each box cluster are reported: (1) the ratio between the number of cell lines where the transcription factor positively binds the promoter over the total number of cell lines tested; (2) the ENCODE cell type abbreviation of cells where the positive binding has been reported.

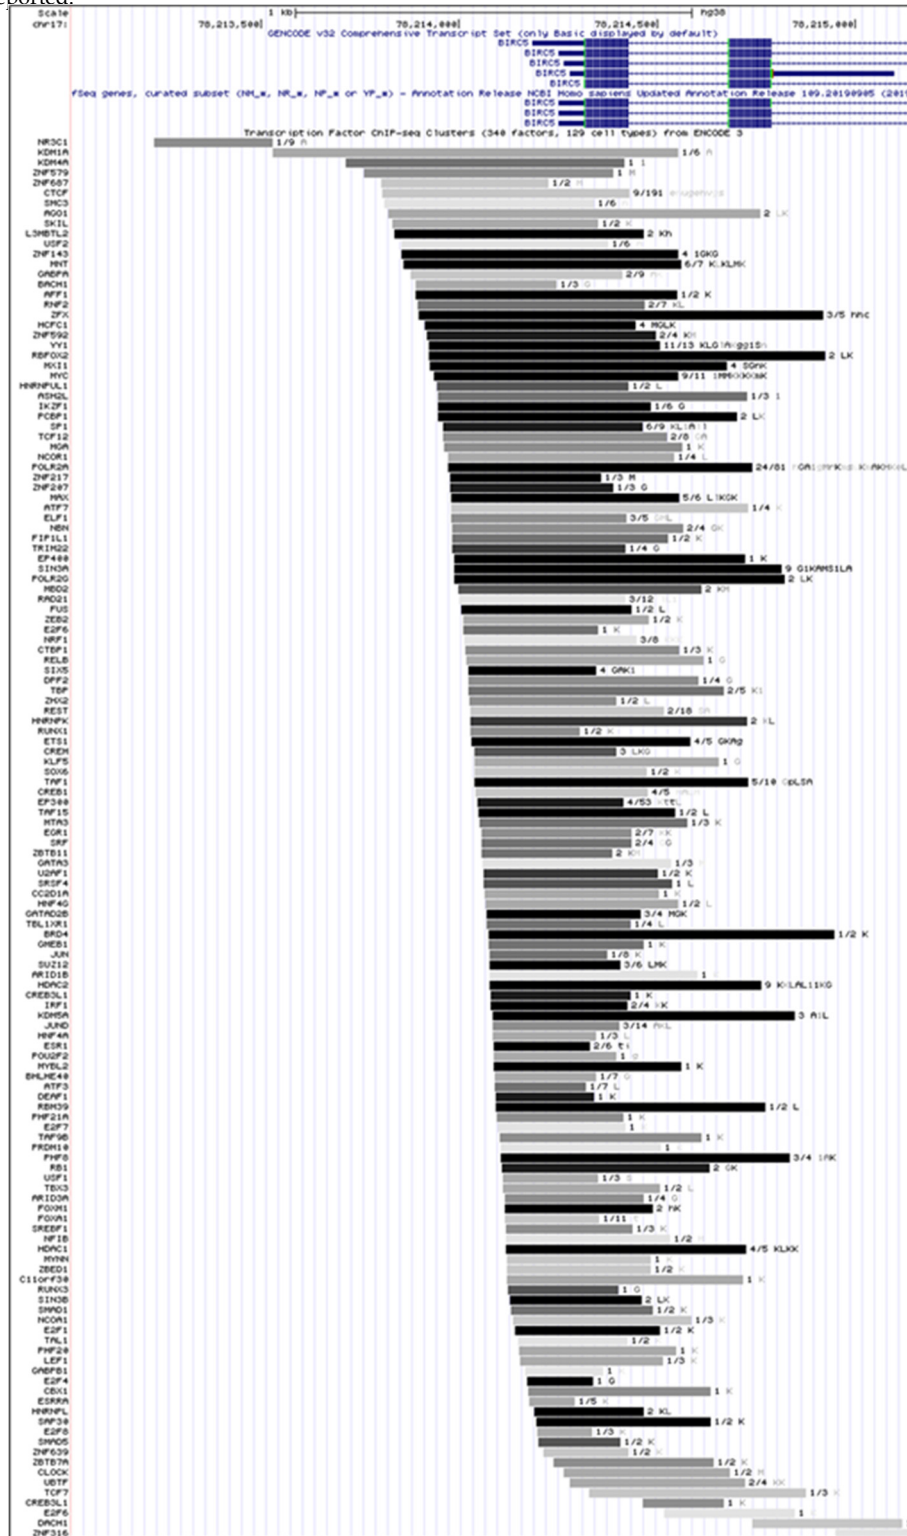

**Figure S2.** *YY1* and *BIRC5* expression values distribution. **A.** Normalized expression box plots showing *YY1* and *BIRC5* expression in the 12 B-NHL GEO datasets. **B.** Histogram distribution of *YY1* and *BIRC5* expression values in the 12 B-NHL GEO datasets. *YY1* 200047\_s\_at (blue) and *BIRC5* 202095\_s\_at (red) were the probes used.

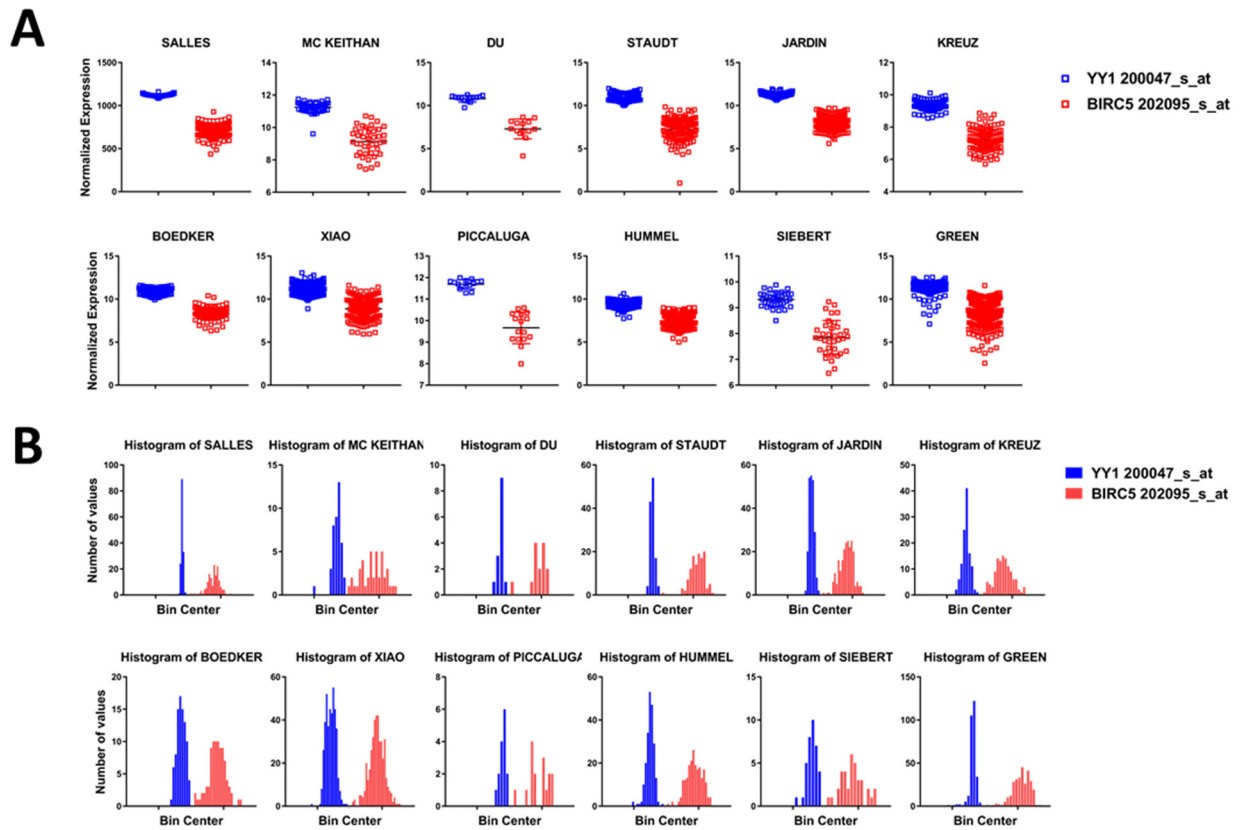

**Figure S3.** Correlation between *YY1* and *BIRC5* expression from the R2 analysis of 8 different GEO B-NHL datasets and relative *YY1* and *BIRC5* expression when samples are subdivided in Stages and Grades subgroups. **A.** GSE93261, FL, Follicular Lymphoma. **B.** GSE81183, FL. **C.** GSE16024, FL and MCL, Mantle Cells Lymphoma. **D.** GSE93291, MCL. **E.** GSE87371, Diffused Large B-cells Lymphoma, DLBCL, patients stratified according to the Stages (I, red; II, yellow, III, blue, IV, grey). **F.** GSE87371. Relative expression of *YY1* in the 4 Stages. **G.** GSE87371. Relative expression of *BIRC5* in the 4 Stages. **H.** GSE57611. DLBCL, patients stratified according to GCB/ABC diagnosis (orange, ABC; blue, GCB; grey, unclassified). **I.** GSE57611. Relative expression of *YY1* in the different diagnosis subgroups. **J.** GSE57611. Relative expression of *BIRC5* in the different diagnosis subgroups. **K.** GSE56315, DLBCL, patients stratified according to GCB/ABC diagnosis (orange, ABC; blue, GCB; grey, unclassified). **L.** GSE56315. Relative expression of *YY1* in the different diagnosis subgroups. **M.** GSE56315. Relative expression of *BIRC5* in the different diagnosis subgroups. **N.** GSE10846, DLBCL, patients stratified according to GCB/ABC diagnosis (orange, ABC; blue, GCB; grey, unclassified). **O.** GSE10846, Relative expression of *YY1* in the different diagnosis subgroups. **P.** GSE10846. Relative expression of *BIRC5* in the different diagnosis subgroups. In F, G, I, J, L, M, O, P data are presented as dotted plots with Median  $\pm$  SD. Significance was evaluated using one-way ANOVA with Tukey's post-hoc comparison test (the differences are not significant, *ns*).

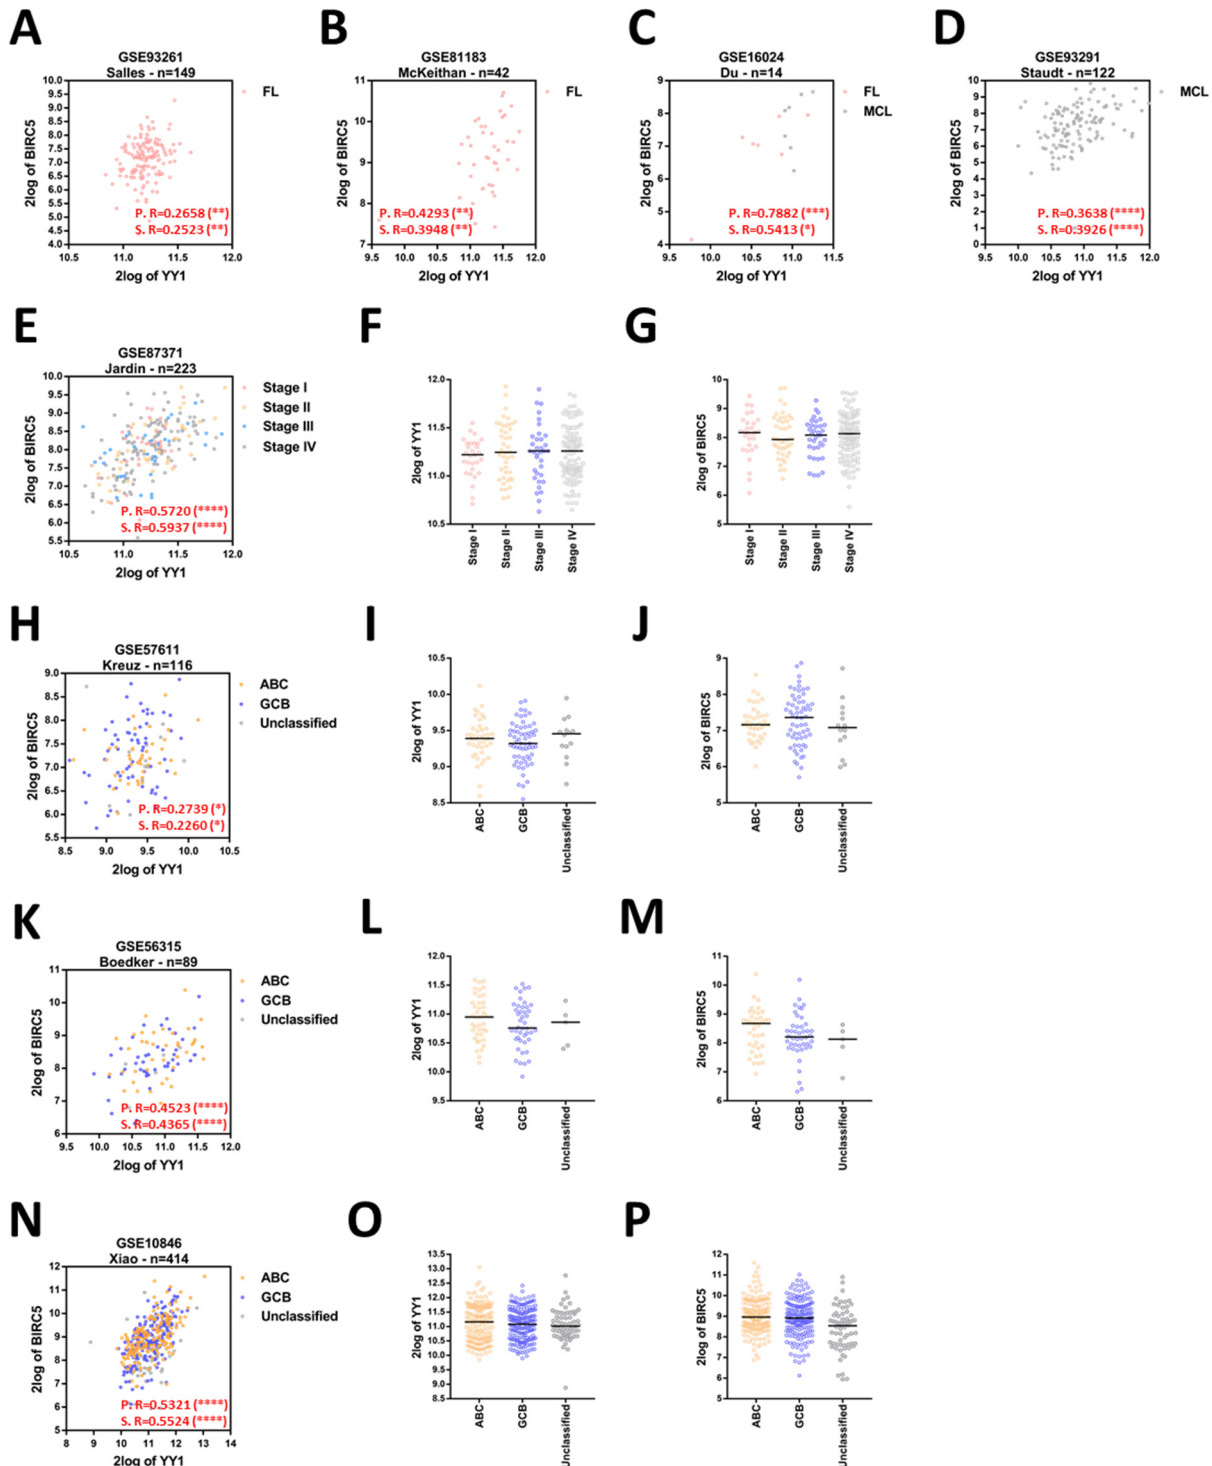

**Figure S4.** *sq*-RT-PCR analysis of YY1 putative transcriptional targets in the apoptotic pathway in Raji CTRL, Raji KD-01 and Raji KD-02 cells. **A.** Gel electrophoresis results. **B.** Densitometry analysis of *sq*-RT-PCR bands, each signal is normalized with GAPDH, used as housekeeping. The results are presented as Mean  $\pm$  SD and one-way ANOVA with Dunnett's post-hoc test have been performed (\*\*  $P < 0.01$ ; where otherwise reported the test is not significant).

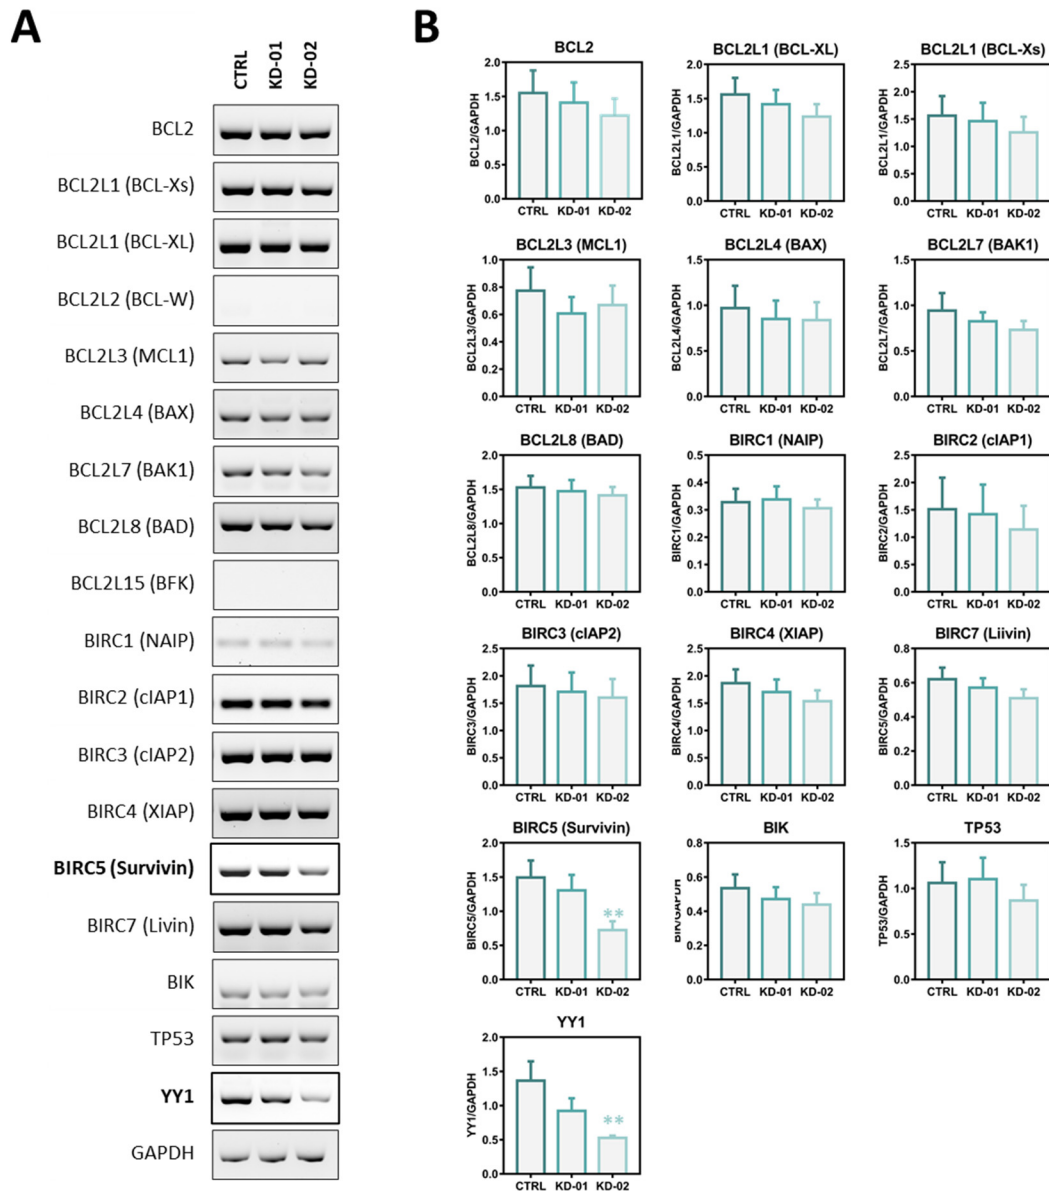

**Figure S5.** Densitometry analysis for YY1 and survivin from the immunoblotting reported in Figure 6. **A.** YY1 protein levels in 0 vs. 72 hours Doxorubicin treated samples. **B.** Survivin protein levels in 0 vs. 72 hours Doxorubicin treated samples. **C.** YY1 protein levels in 0 vs. 72 hours Vincristine treated samples. **D.** Survivin protein levels in 0 vs. 72 hours Vincristine treated samples. Data are expressed as fold change of the normalized signals, referred to the 0 hours CTRL value. The results are presented as Mean  $\pm$  SD and the comparison between the values obtained in CTRL vs. KD-02 protein samples was performed using the two-tailed unpaired t-test with Holm-Sidak correction for multiple comparisons (\*P < 0.05; \*\* P < 0.01; \*\*\* P < 0.001; \*\*\*\* P < 0.0001).

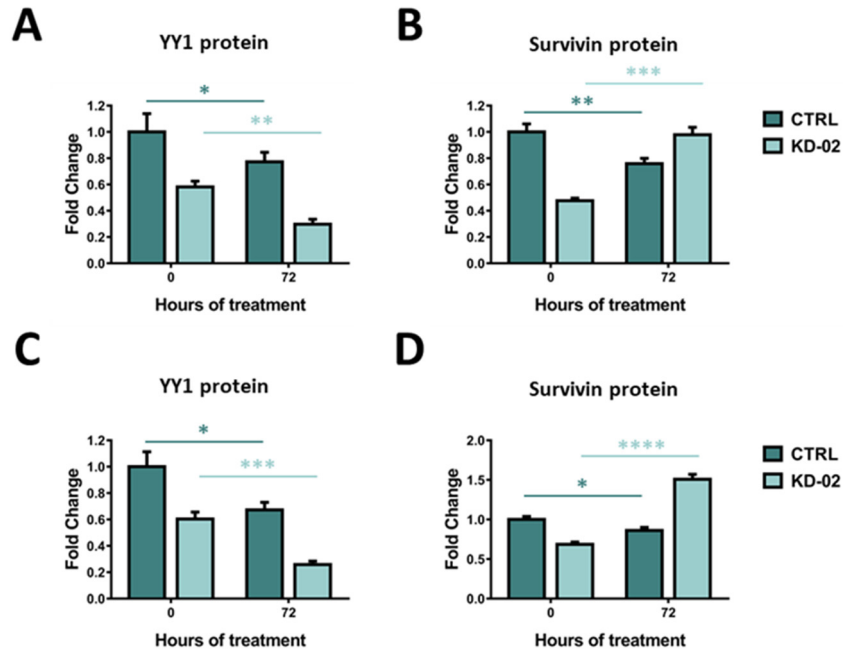

**Figure S6.** Retroviral pSMP plasmid features. With miR-30 hairpin, which includes the specific 21-mers against selected targets, reported in lower part of the figure, with specific hairpin sequences for pSMP-YY1\_1, pSMP-YY1\_2 and pSMP-LUC.

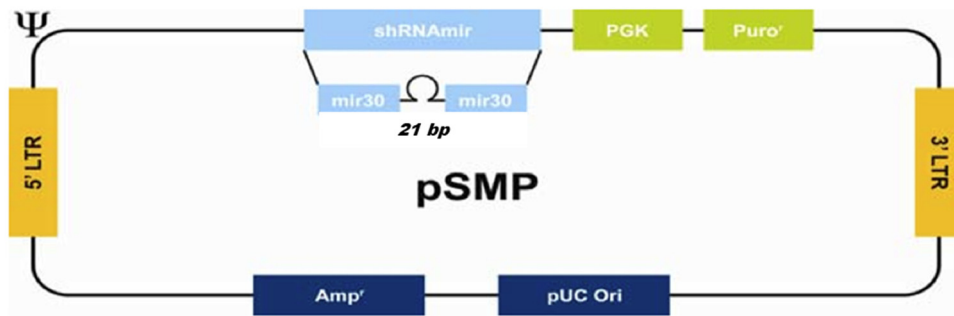

**shRNA TARGETING SEQUENCES (21bp):**

**KD-01** GCTCTGTAATCTCGTTTCAAA

**KD-02** CCTCCTGATTATTCAGAATAT

**CTRL** CCGCCTGAAGTCTCTGATTAA

**shRNAmir sequences:**

**KD-01:** PSMP-YY1\_1 (NM\_003403.5; EXON 5 – 1164-6534, 3'-UTR, 1552-1570)

TGCTGTTGACAGTGAGCGCGCTCTGTAATCTCGTTTCAAATAGTGAAGCCACAGATGTATTTGA  
AACGAGATTACAGAGCATGCCTACTGCCTCGGA

**KD-02:** PSMP-YY1\_2 (NM\_003403.5; EXON 2 – 781-943, CDS, 844-862)

TGCTGTTGACAGTGAGCGCCCTCCTGATTATTCAGAATATTAGTGAAGCCACAGATGTAATATTC  
TGAATAATCAGGAGTTGCCTACTGCCTCGGA

**CTRL:** PSMP-LUC (FIREFLY LUCIFERASE)

TGCTGTTGACAGTGAGCGCCCGCCTGAAGTCTCTGATTAATAGTGAAGCCACAGATGTATTAAT  
CAGAGACTTCAGGCGGTTGCCTACTGCCTCGGA

**Table S1.** JASPAR *in-silico* analysis of putative YY1 transcriptional targets among the main apoptosis regulators.

| GENE ALIAS | GENE ID | Relative score | Sequence ID                                    | Start | End  | Strand | Predicted sequence |
|------------|---------|----------------|------------------------------------------------|-------|------|--------|--------------------|
| BCL2       | BCL2    | 0,823          | chromosome:GRCh38:18:6312274<br>6:63322128:-1  | 308   | 319  | +      | CAGTATGGCGAA       |
| BCL2       | BCL2    | 0,819          | chromosome:GRCh38:18:6312274<br>6:63322128:-1  | 2689  | 2700 | -      | AAAAAAGGCAGC       |
| BCL2       | BCL2    | 0,816          | chromosome:GRCh38:18:6312274<br>6:63322128:-1  | 82    | 93   | -      | AGAGATGGCTTT       |
| BCL-Xs/XL  | BCL2L1  | 0,900          | chromosome:GRCh38:20:3166385<br>2:31725989:-1  | 2692  | 2703 | -      | CACAATGGCCGC       |
| BCL-Xs/XL  | BCL2L1  | 0,891          | chromosome:GRCh38:20:3166385<br>2:31725989:-1  | 938   | 949  | +      | CAAAATGGTGAA       |
| BCL-Xs/XL  | BCL2L1  | 0,848          | chromosome:GRCh38:20:3166385<br>2:31725989:-1  | 508   | 519  | -      | CGAGATGGAGTC       |
| BCL-Xs/XL  | BCL2L1  | 0,848          | chromosome:GRCh38:20:3166385<br>2:31725989:-1  | 1115  | 1126 | -      | CGAGATGGAGTC       |
| BCL-Xs/XL  | BCL2L1  | 0,828          | chromosome:GRCh38:20:3166385<br>2:31725989:-1  | 1074  | 1085 | +      | CAAGATAGCACC       |
| BCL-Xs/XL  | BCL2L1  | 0,823          | chromosome:GRCh38:20:3166385<br>2:31725989:-1  | 641   | 652  | +      | CAACATGGGGAA       |
| BCL-W      | BCL2L2  | 0,937          | chromosome:GRCh38:14:2329679<br>0:23312359:1   | 2102  | 2113 | -      | AAAGATGGCTGA       |
| BCL-W      | BCL2L2  | 0,920          | chromosome:GRCh38:14:2329679<br>0:23312359:1   | 1831  | 1842 | +      | CAACATGGCAGT       |
| BCL-W      | BCL2L2  | 0,808          | chromosome:GRCh38:14:2329679<br>0:23312359:1   | 2814  | 2825 | +      | CAAAATGAAGGT       |
| BCL-W      | BCL2L2  | 0,800          | chromosome:GRCh38:14:2329679<br>0:23312359:1   | 1552  | 1563 | +      | CATCATGGTTAC       |
| MCL1       | BCL2L3  | 0,935          | chromosome:GRCh38:1:15057395<br>1:150581738:-1 | 996   | 1007 | -      | CAACATGGCTGT       |
| MCL1       | BCL2L3  | 0,884          | chromosome:GRCh38:1:15057395<br>1:150581738:-1 | 1373  | 1384 | +      | AAAAATGGTGTC       |
| MCL1       | BCL2L3  | 0,875          | chromosome:GRCh38:1:15057395<br>1:150581738:-1 | 606   | 617  | +      | CAACATGGTGAA       |
| MCL1       | BCL2L3  | 0,870          | chromosome:GRCh38:1:15057395<br>1:150581738:-1 | 2557  | 2568 | -      | CATGATGGCGTC       |
| MCL1       | BCL2L3  | 0,864          | chromosome:GRCh38:1:15057395<br>1:150581738:-1 | 386   | 397  | +      | CAAAAGGCTGC        |
| MCL1       | BCL2L3  | 0,841          | chromosome:GRCh38:1:15057395<br>1:150581738:-1 | 747   | 758  | -      | CACAATGGTGGA       |
| MCL1       | BCL2L3  | 0,826          | chromosome:GRCh38:1:15057395<br>1:150581738:-1 | 2535  | 2546 | +      | GGAGATGGAAGC       |
| BAX        | BCL2L4  | 0,984          | chromosome:GRCh38:19:4895281<br>5:48962398:1   | 1995  | 2006 | -      | CAAAATGGCCGC       |
| BAX        | BCL2L4  | 0,887          | chromosome:GRCh38:19:4895281<br>5:48962398:1   | 1819  | 1830 | +      | AAAAATGGTGCC       |
| BAX        | BCL2L4  | 0,832          | chromosome:GRCh38:19:4895281<br>5:48962398:1   | 1093  | 1104 | +      | AAATATGGCATA       |
| BAX        | BCL2L4  | 0,828          | chromosome:GRCh38:19:4895281<br>5:48962398:1   | 2766  | 2777 | -      | CAAAAGGGCCCC       |
| BAX        | BCL2L4  | 0,806          | chromosome:GRCh38:19:4895281<br>5:48962398:1   | 984   | 995  | -      | CAGGATGGAGTG       |
| BAX        | BCL2L4  | 0,803          | chromosome:GRCh38:19:4895281<br>5:48962398:1   | 845   | 856  | -      | AAAGATGGGGTT       |
| BAK1       | BCL2L7  | 0,880          | chromosome:GRCh38:6:33571947<br>:33582293:-1   | 958   | 969  | +      | AAACATGGCTCA       |
| BAK1       | BCL2L7  | 0,878          | chromosome:GRCh38:6:33571947<br>:33582293:-1   | 467   | 478  | -      | TAACATGGCGAA       |
| BAK1       | BCL2L7  | 0,878          | chromosome:GRCh38:6:33571947<br>:33582293:-1   | 2883  | 2894 | -      | TAAGATGGCCTT       |
| BAK1       | BCL2L7  | 0,842          | chromosome:GRCh38:6:33571947<br>:33582293:-1   | 387   | 398  | +      | CAGGATGGTCTC       |

|      |             |       |                                                |      |      |   |              |
|------|-------------|-------|------------------------------------------------|------|------|---|--------------|
| BAK1 | BCL2L7      | 0,837 | chromosome:GRCh38:6:33571947<br>:33582293:-1   | 1566 | 1577 | + | CAGAATGGTCTC |
| BAK1 | BCL2L7      | 0,835 | chromosome:GRCh38:6:33571947<br>:33582293:-1   | 373  | 384  | - | TAACATGGTGAA |
| BAK1 | BCL2L7      | 0,835 | chromosome:GRCh38:6:33571947<br>:33582293:-1   | 1552 | 1563 | - | TAACATGGTGAA |
| BAK1 | BCL2L7      | 0,832 | chromosome:GRCh38:6:33571947<br>:33582293:-1   | 432  | 443  | - | CAAAAGGGAGGC |
| BAK1 | BCL2L7      | 0,819 | chromosome:GRCh38:6:33571947<br>:33582293:-1   | 892  | 903  | - | AAAAAAGGCAGC |
| BAK1 | BCL2L7      | 0,816 | chromosome:GRCh38:6:33571947<br>:33582293:-1   | 2218 | 2229 | - | GGAGATGGAGGT |
| BAK1 | BCL2L7      | 0,814 | chromosome:GRCh38:6:33571947<br>:33582293:-1   | 848  | 859  | + | CCAAATGGCTGG |
| BAK1 | BCL2L7      | 0,808 | chromosome:GRCh38:6:33571947<br>:33582293:-1   | 1374 | 1385 | + | TGAGATGGAGTC |
| BAK1 | BCL2L7      | 0,804 | chromosome:GRCh38:6:33571947<br>:33582293:-1   | 275  | 286  | - | GAGAATGGCGTG |
| BAD  | BCL2L8      | 0,955 | chromosome:GRCh38:11:6426923<br>0:64286704:-1  | 1223 | 1234 | + | CAAGATGGCCCC |
| BAD  | BCL2L8      | 0,913 | chromosome:GRCh38:11:6426923<br>0:64286704:-1  | 2759 | 2770 | + | AAAAATGGTTGC |
| BAD  | BCL2L8      | 0,900 | chromosome:GRCh38:11:6426923<br>0:64286704:-1  | 2509 | 2520 | - | CATGATGGCTGC |
| BAD  | BCL2L8      | 0,841 | chromosome:GRCh38:11:6426923<br>0:64286704:-1  | 1460 | 1471 | + | CGAGATGGCGCG |
| BAD  | BCL2L8      | 0,812 | chromosome:GRCh38:11:6426923<br>0:64286704:-1  | 1016 | 1027 | + | CAGGAGGGCGGC |
| BAD  | BCL2L8      | 0,812 | chromosome:GRCh38:11:6426923<br>0:64286704:-1  | 2514 | 2525 | + | CATCATGGAGGT |
| BAD  | BCL2L8      | 0,812 | chromosome:GRCh38:11:6426923<br>0:64286704:-1  | 1410 | 1421 | - | TGGGATGGCTGC |
| BFK  | BCL2L1<br>5 | 0,894 | chromosome:GRCh38:1:11387621<br>6:113889581:-1 | 867  | 878  | - | CAACATGGCAAA |
| BFK  | BCL2L1<br>5 | 0,885 | chromosome:GRCh38:1:11387621<br>6:113889581:-1 | 537  | 548  | - | TAAAATGGCCAA |
| BFK  | BCL2L1<br>5 | 0,867 | chromosome:GRCh38:1:11387621<br>6:113889581:-1 | 450  | 461  | - | CAAAATGGTACA |
| BFK  | BCL2L1<br>5 | 0,832 | chromosome:GRCh38:1:11387621<br>6:113889581:-1 | 1435 | 1446 | - | CAAAAAGGAGGC |
| BFK  | BCL2L1<br>5 | 0,830 | chromosome:GRCh38:1:11387621<br>6:113889581:-1 | 441  | 452  | + | CAAAGTGGCTGT |
| BFK  | BCL2L1<br>5 | 0,801 | chromosome:GRCh38:1:11387621<br>6:113889581:-1 | 1161 | 1172 | + | AATGATGGAGTC |
| BFK  | BCL2L1<br>5 | 0,801 | chromosome:GRCh38:1:11387621<br>6:113889581:-1 | 73   | 84   | - | CACCATGGCACT |
| NAIP | BIRC1       | 0,914 | chromosome:GRCh38:5:70967883<br>:71027114:-1   | 2848 | 2859 | - | TAAAATGGAGGC |
| NAIP | BIRC1       | 0,875 | chromosome:GRCh38:5:70967883<br>:71027114:-1   | 1553 | 1564 | + | CAACATGGTGAA |
| NAIP | BIRC1       | 0,859 | chromosome:GRCh38:5:70967883<br>:71027114:-1   | 18   | 29   | + | AAAGATGGTTAA |
| NAIP | BIRC1       | 0,842 | chromosome:GRCh38:5:70967883<br>:71027114:-1   | 1539 | 1550 | - | CAGGATGGTCTC |
| NAIP | BIRC1       | 0,839 | chromosome:GRCh38:5:70967883<br>:71027114:-1   | 2180 | 2191 | + | CAGGATGGGGGC |
| NAIP | BIRC1       | 0,835 | chromosome:GRCh38:5:70967883<br>:71027114:-1   | 254  | 265  | + | TAACATGGTGAA |
| NAIP | BIRC1       | 0,810 | chromosome:GRCh38:5:70967883<br>:71027114:-1   | 2396 | 2407 | + | CAAGAAGGCGAT |
| NAIP | BIRC1       | 0,809 | chromosome:GRCh38:5:70967883<br>:71027114:-1   | 1306 | 1317 | + | AGAAATGGCCTT |
| NAIP | BIRC1       | 0,804 | chromosome:GRCh38:5:70967883<br>:71027114:-1   | 1138 | 1149 | - | CCAGATGGCAGG |
| NAIP | BIRC1       | 0,803 | chromosome:GRCh38:5:70967883<br>:71027114:-1   | 1949 | 1960 | - | CAATATTGCAGC |



|          |       |       |                                                |      |      |   |              |
|----------|-------|-------|------------------------------------------------|------|------|---|--------------|
| NAIP     | BIRC1 | 0,801 | chromosome:GRCh38:5:70967883<br>:71027114:-1   | 1852 | 1863 | + | TAATATGGAGAT |
| cIAP1    | BIRC2 | 0,850 | chromosome:GRCh38:11:1023452<br>11:102379270:1 | 102  | 113  | - | TAAGATGGACAA |
| cIAP1    | BIRC2 | 0,820 | chromosome:GRCh38:11:1023452<br>11:102379270:1 | 1532 | 1543 | - | GAGGATGGAGTC |
| cIAP2    | BIRC3 | 0,887 | chromosome:GRCh38:11:1023154<br>50:102340003:1 | 868  | 879  | + | GAAAATGGCTTA |
| cIAP2    | BIRC3 | 0,875 | chromosome:GRCh38:11:1023154<br>50:102340003:1 | 279  | 290  | - | CAACATGGTGAA |
| cIAP2    | BIRC3 | 0,862 | chromosome:GRCh38:11:1023154<br>50:102340003:1 | 1233 | 1244 | + | AAATATGGCAGT |
| cIAP2    | BIRC3 | 0,827 | chromosome:GRCh38:11:1023154<br>50:102340003:1 | 1446 | 1457 | + | TAAAATGGTAAA |
| cIAP2    | BIRC3 | 0,814 | chromosome:GRCh38:11:1023154<br>50:102340003:1 | 2575 | 2586 | + | CAGCATGAAAAC |
| XIAP     | BIRC4 | 0,940 | chromosome:GRCh38:X:1238577<br>24:123914579:1  | 2191 | 2202 | + | AAAAATGGCGGA |
| XIAP     | BIRC4 | 0,875 | chromosome:GRCh38:X:1238577<br>24:123914579:1  | 823  | 834  | - | CAACATGGTGAA |
| XIAP     | BIRC4 | 0,854 | chromosome:GRCh38:X:1238577<br>24:123914579:1  | 219  | 230  | + | AAAAATGGTTAA |
| XIAP     | BIRC4 | 0,842 | chromosome:GRCh38:X:1238577<br>24:123914579:1  | 529  | 540  | + | CAGGATGGTCTC |
| XIAP     | BIRC4 | 0,838 | chromosome:GRCh38:X:1238577<br>24:123914579:1  | 177  | 188  | + | GGAGATGGTTGC |
| XIAP     | BIRC4 | 0,827 | chromosome:GRCh38:X:1238577<br>24:123914579:1  | 228  | 239  | + | TAAAATGGTAAA |
| XIAP     | BIRC4 | 0,818 | chromosome:GRCh38:X:1238577<br>24:123914579:1  | 118  | 129  | + | CTACATGGCAGA |
| XIAP     | BIRC4 | 0,804 | chromosome:GRCh38:X:1238577<br>24:123914579:1  | 417  | 428  | - | GAGAATGGCGTG |
| XIAP     | BIRC4 | 0,801 | chromosome:GRCh38:X:1238577<br>24:123914579:1  | 1412 | 1423 | - | GAAAATGGGATC |
| Survivin | BIRC5 | 0,845 | chromosome:GRCh38:17:7821218<br>6:78226236:1   | 770  | 781  | + | AAACATGGTGAA |
| Survivin | BIRC5 | 0,845 | chromosome:GRCh38:17:7821218<br>6:78226236:1   | 155  | 166  | - | CACCATGGCCTC |
| Survivin | BIRC5 | 0,807 | chromosome:GRCh38:17:7821218<br>6:78226236:1   | 2491 | 2502 | + | GCAGATGGCCGA |
| Survivin | BIRC5 | 0,804 | chromosome:GRCh38:17:7821218<br>6:78226236:1   | 2819 | 2830 | + | TAAGATGCCTGA |
| Survivin | BIRC5 | 0,804 | chromosome:GRCh38:17:7821218<br>6:78226236:1   | 1002 | 1013 | + | AAGAATGGGGGC |
| Livin    | BIRC7 | 0,878 | chromosome:GRCh38:20:6323388<br>3:63241095:1   | 2833 | 2844 | - | CAAGCTGGCGGC |
| Livin    | BIRC7 | 0,833 | chromosome:GRCh38:20:6323388<br>3:63241095:1   | 2428 | 2439 | - | CAAGGTGGCCCC |
| Livin    | BIRC7 | 0,829 | chromosome:GRCh38:20:6323388<br>3:63241095:1   | 1813 | 1824 | - | GATGATGGCTCC |
| Livin    | BIRC7 | 0,802 | chromosome:GRCh38:20:6323388<br>3:63241095:1   | 1881 | 1892 | - | GAGCATGGAGAC |
| BIK      | BIK   | 0,926 | chromosome:GRCh38:22:4310875<br>0:43130312:1   | 2500 | 2511 | + | GAAGATGGCGTC |
| BIK      | BIK   | 0,871 | chromosome:GRCh38:22:4310875<br>0:43130312:1   | 194  | 205  | - | AAAGATGGAGAA |
| BIK      | BIK   | 0,865 | chromosome:GRCh38:22:4310875<br>0:43130312:1   | 597  | 608  | + | CAATATGGCAAA |
| BIK      | BIK   | 0,838 | chromosome:GRCh38:22:4310875<br>0:43130312:1   | 75   | 86   | - | AGAGATGGCTGG |
| BIK      | BIK   | 0,807 | chromosome:GRCh38:22:4310875<br>0:43130312:1   | 379  | 390  | - | CATAATGGGGGC |
| TP53     | TP53  | 0,888 | chromosome:GRCh38:17:7661179<br>:7689550:-1    | 938  | 949  | + | CAGGATGGCTTC |
| TP53     | TP53  | 0,843 | chromosome:GRCh38:17:7661179<br>:7689550:-1    | 335  | 346  | + | GAAGATGGGGGA |

|      |      |       |                                             |      |      |   |              |
|------|------|-------|---------------------------------------------|------|------|---|--------------|
| TP53 | TP53 | 0,828 | chromosome:GRCh38:17:7661179<br>:7689550:-1 | 1618 | 1629 | + | TAAGATGGTGTG |
| TP53 | TP53 | 0,823 | chromosome:GRCh38:17:7661179<br>:7689550:-1 | 1278 | 1289 | - | CAAGATAGAAGC |
| TP53 | TP53 | 0,808 | chromosome:GRCh38:17:7661179<br>:7689550:-1 | 2834 | 2845 | - | TACAGGGCTGC  |
| TP53 | TP53 | 0,806 | chromosome:GRCh38:17:7661179<br>:7689550:-1 | 2694 | 2705 | - | AAAGATCGCTCC |

---

**Table S2.** ChIP-Seq YY1-BIRC5 interaction levels in the 11 studies deposited in ENCODE.

| YY1-ChIP Signal Strength | Sample Name | Sample Summary                                                  | Sample Species   | Sample Type | Experiment ID |
|--------------------------|-------------|-----------------------------------------------------------------|------------------|-------------|---------------|
| 1000                     | HepG2       | Epithelium, hepatocellular carcinoma                            | <i>H sapiens</i> | Cancer      | ENCSR000BNT   |
| 1000                     | K562        | Myeloid lineage, myeloblasts, chronic myelogenous leukemia      | <i>H sapiens</i> | Cancer      | ENCSR000BMH   |
| 1000                     | SK-N-SH     | Brain, derived from metastatic site: bone marrow, neuroblastoma | <i>H sapiens</i> | Cancer      | ENCSR000BLZ   |
| 734                      | A549        | Epithelium, lung carcinoma                                      | <i>H sapiens</i> | Cancer      | ENCSR000BPM   |
| 319                      | K562        | Myeloid lineage, myeloblasts, chronic myelogenous leukemia      | <i>H sapiens</i> | Cancer      | ENCSR000EWF   |
| 279                      | NT2/D1      | Testis; embryonal carcinoma derived from metastatic site: lung  | <i>H sapiens</i> | Cancer      | ENCSR000EXG   |
| 1000                     | GM12878     | Lymphoid lineage, B-lymphoblastoid cell line                    | <i>H sapiens</i> | Normal      | ENCSR000BNP   |
| 947                      | GM12892     | Lymphoid lineage, B-lymphoblastoid cell line                    | <i>H sapiens</i> | Normal      | ENCSR000BLT   |
| 846                      | H1-hESC     | Pluripotent, embryonic stem cells                               | <i>H sapiens</i> | Normal      | ENCSR000BKD   |
| 831                      | GM12891     | Lymphoid lineage, B-lymphoblastoid cell line                    | <i>H sapiens</i> | Normal      | ENCSR000BKJ   |
| 418                      | Liver       | Normal adult liver tissue                                       | <i>H sapiens</i> | Normal      | ENCSR382MOM   |

\*signal strength score range 0 to 1000

**Table S3.** Statistics of Figure 2

| YY1- MAS5,0 - u133p2                     |            |                      |               |         |                  |     |  |
|------------------------------------------|------------|----------------------|---------------|---------|------------------|-----|--|
| Number of families                       | 1          |                      |               |         |                  |     |  |
| Number of comparisons per family         | 66         |                      |               |         |                  |     |  |
| Alpha                                    | 0,05       |                      |               |         |                  |     |  |
| Tukey's multiple comparisons test        | Mean Diff, | 95,00% CI of diff,   | Significant ? | Summary | Adjusted P Value |     |  |
| T- GSE26673 - 16 vs. T- GSE132929 - 290  | 0,3311     | -0,1041 to 0,7663    | No            | ns      | 0,3472           | A-B |  |
| T- GSE26673 - 16 vs. T- GSE10846 - 420   | 0,5089     | 0,07725 to 0,9406    | Yes           | **      | 0,0066           | A-C |  |
| T- GSE26673 - 16 vs. T- GSE56315 - 122   | 1,159      | 0,7086 to 1,61       | Yes           | ****    | <0,0001          | A-D |  |
| T- GSE26673 - 16 vs. T- GSE87371 - 223   | 0,3616     | -0,07701 to 0,8002   | No            | ns      | 0,2282           | A-E |  |
| T- GSE26673 - 16 vs. T- GSE81183 - 42    | 0,3447     | -0,1532 to 0,8426    | No            | ns      | 0,5022           | A-F |  |
| T- GSE26673 - 16 vs. T- GSE93261 - 149   | 0,3878     | -0,05806 to 0,8336   | No            | ns      | 0,1619           | A-G |  |
| T- GSE26673 - 16 vs. T- GSE16024 - 14    | 0,7866     | 0,1664 to 1,407      | Yes           | **      | 0,002            | A-H |  |
| T- GSE26673 - 16 vs. T- GSE93291 -122    | 0,6979     | 0,2473 to 1,149      | Yes           | ****    | <0,0001          | A-I |  |
| T- GSE26673 - 16 vs. N- GSE7307 - 504    | 2,525      | 2,094 to 2,955       | Yes           | ****    | <0,0001          | A-J |  |
| T- GSE26673 - 16 vs. N- GSE3526 - 353    | 2,717      | 2,283 to 3,15        | Yes           | ****    | <0,0001          | A-K |  |
| T- GSE26673 - 16 vs. N- GSE46510 - 154   | 1,263      | 0,8181 to 1,708      | Yes           | ****    | <0,0001          | A-L |  |
| T- GSE132929 - 290 vs. T- GSE10846 - 420 | 0,1778     | 0,0484 to 0,3072     | Yes           | ***     | 0,0005           | B-C |  |
| T- GSE132929 - 290 vs. T- GSE56315 - 122 | 0,828      | 0,6452 to 1,011      | Yes           | ****    | <0,0001          | B-D |  |
| T- GSE132929 - 290 vs. T- GSE87371 - 223 | 0,03047    | -0,1205 to 0,1814    | No            | ns      | >0,9999          | B-E |  |
| T- GSE132929 - 290 vs. T- GSE81183 - 42  | 0,01357    | -0,2662 to 0,2934    | No            | ns      | >0,9999          | B-F |  |
| T- GSE132929 - 290 vs. T- GSE93261 - 149 | 0,05665    | -0,1142 to 0,2275    | No            | ns      | 0,9953           | B-G |  |
| T- GSE132929 - 290 vs. T- GSE16024 - 14  | 0,4555     | -0,008248 to 0,9192  | No            | ns      | 0,0596           | B-H |  |
| T- GSE132929 - 290 vs. T- GSE93291 -122  | 0,3668     | 0,1839 to 0,5497     | Yes           | ****    | <0,0001          | B-I |  |
| T- GSE132929 - 290 vs. N- GSE7307 - 504  | 2,194      | 2,069 to 2,318       | Yes           | ****    | <0,0001          | B-J |  |
| T- GSE132929 - 290 vs. N- GSE3526 - 353  | 2,386      | 2,251 to 2,52        | Yes           | ****    | <0,0001          | B-K |  |
| T- GSE132929 - 290 vs. N- GSE46510 - 154 | 0,9321     | 0,7631 to 1,101      | Yes           | ****    | <0,0001          | B-L |  |
| T- GSE10846 - 420 vs. T- GSE56315 - 122  | 0,6502     | 0,4759 to 0,8245     | Yes           | ****    | <0,0001          | C-D |  |
| T- GSE10846 - 420 vs. T- GSE87371 - 223  | -0,1473    | -0,2877 to -0,006903 | Yes           | *       | 0,03             | C-E |  |
| T- GSE10846 - 420 vs. T- GSE81183 - 42   | -0,1642    | -0,4385 to 0,11      | No            | ns      | 0,7215           | C-F |  |
| T- GSE10846 - 420 vs. T- GSE93261 - 149  | -0,1211    | -0,2827 to 0,04045   | No            | ns      | 0,3711           | C-G |  |
| T- GSE10846 - 420 vs. T- GSE16024 - 14   | 0,2777     | -0,1827 to 0,7381    | No            | ns      | 0,7119           | C-H |  |
| T- GSE10846 - 420 vs. T- GSE93291 -122   | 0,189      | 0,01472 to 0,3633    | Yes           | *       | 0,0203           | C-I |  |
| T- GSE10846 - 420 vs. N- GSE7307 - 504   | 2,016      | 1,904 to 2,128       | Yes           | ****    | <0,0001          | C-J |  |
| T- GSE10846 - 420 vs. N- GSE3526 - 353   | 2,208      | 2,085 to 2,33        | Yes           | ****    | <0,0001          | C-K |  |
| T- GSE10846 - 420 vs. N- GSE46510 - 154  | 0,7543     | 0,5947 to 0,914      | Yes           | ****    | <0,0001          | C-L |  |
| T- GSE56315 - 122 vs. T- GSE87371 - 223  | -0,7976    | -0,9884 to -0,6067   | Yes           | ****    | <0,0001          | D-E |  |
| T- GSE56315 - 122 vs. T- GSE81183 - 42   | -0,8145    | -1,118 to -0,5113    | Yes           | ****    | <0,0001          | D-F |  |
| T- GSE56315 - 122 vs. T- GSE93261 - 149  | -0,7714    | -0,9783 to -0,5645   | Yes           | ****    | <0,0001          | D-G |  |
| T- GSE56315 - 122 vs. T- GSE16024 - 14   | -0,3726    | -0,8508 to 0,1057    | No            | ns      | 0,3102           | D-H |  |
| T- GSE56315 - 122 vs. T- GSE93291 -122   | -0,4612    | -0,6782 to -0,2442   | Yes           | ****    | <0,0001          | D-I |  |
| T- GSE56315 - 122 vs. N- GSE7307 - 504   | 1,366      | 1,195 to 1,537       | Yes           | ****    | <0,0001          | D-J |  |
| T- GSE56315 - 122 vs. N- GSE3526 - 353   | 1,557      | 1,38 to 1,735        | Yes           | ****    | <0,0001          | D-K |  |
| T- GSE56315 - 122 vs. N- GSE46510 - 154  | 0,1041     | -0,1013 to 0,3095    | No            | ns      | 0,8871           | D-L |  |
| T- GSE87371 - 223 vs. T- GSE81183 - 42   | -0,0169    | -0,302 to 0,2682     | No            | ns      | >0,9999          | E-F |  |

|                                         |          |                    |     |      |         |     |
|-----------------------------------------|----------|--------------------|-----|------|---------|-----|
| T- GSE87371 - 223 vs. T- GSE93261 - 149 | 0,02618  | -0,1531 to 0,2055  | No  | ns   | >0,9999 | E-G |
| T- GSE87371 - 223 vs. T- GSE16024 - 14  | 0,425    | -0,04191 to 0,8919 | No  | ns   | 0,1157  | E-H |
| T- GSE87371 - 223 vs. T- GSE93291 -122  | 0,3363   | 0,1455 to 0,5272   | Yes | **** | <0,0001 | E-I |
| T- GSE87371 - 223 vs. N- GSE7307 - 504  | 2,163    | 2,027 to 2,299     | Yes | **** | <0,0001 | E-J |
| T- GSE87371 - 223 vs. N- GSE3526 - 353  | 2,355    | 2,21 to 2,5        | Yes | **** | <0,0001 | E-K |
| T- GSE87371 - 223 vs. N- GSE46510 - 154 | 0,9016   | 0,7241 to 1,079    | Yes | **** | <0,0001 | E-L |
| T- GSE81183 - 42 vs. T- GSE93261 - 149  | 0,04307  | -0,253 to 0,3391   | No  | ns   | >0,9999 | F-G |
| T- GSE81183 - 42 vs. T- GSE16024 - 14   | 0,4419   | -0,08108 to 0,9649 | No  | ns   | 0,1962  | F-H |
| T- GSE81183 - 42 vs. T- GSE93291 -122   | 0,3532   | 0,05005 to 0,6564  | Yes | **   | 0,0078  | F-I |
| T- GSE81183 - 42 vs. N- GSE7307 - 504   | 2,18     | 1,908 to 2,452     | Yes | **** | <0,0001 | F-J |
| T- GSE81183 - 42 vs. N- GSE3526 - 353   | 2,372    | 2,095 to 2,649     | Yes | **** | <0,0001 | F-K |
| T- GSE81183 - 42 vs. N- GSE46510 - 154  | 0,9185   | 0,6235 to 1,214    | Yes | **** | <0,0001 | F-L |
| T- GSE93261 - 149 vs. T- GSE16024 - 14  | 0,3988   | -0,07489 to 0,8726 | No  | ns   | 0,2008  | G-H |
| T- GSE93261 - 149 vs. T- GSE93291 -122  | 0,3102   | 0,1032 to 0,5171   | Yes | **** | <0,0001 | G-I |
| T- GSE93261 - 149 vs. N- GSE7307 - 504  | 2,137    | 1,979 to 2,295     | Yes | **** | <0,0001 | G-J |
| T- GSE93261 - 149 vs. N- GSE3526 - 353  | 2,329    | 2,163 to 2,494     | Yes | **** | <0,0001 | G-K |
| T- GSE93261 - 149 vs. N- GSE46510 - 154 | 0,8755   | 0,6807 to 1,07     | Yes | **** | <0,0001 | G-L |
| T- GSE16024 - 14 vs. T- GSE93291 -122   | -0,08868 | -0,5669 to 0,3895  | No  | ns   | >0,9999 | H-I |
| T- GSE16024 - 14 vs. N- GSE7307 - 504   | 1,738    | 1,279 to 2,197     | Yes | **** | <0,0001 | H-J |
| T- GSE16024 - 14 vs. N- GSE3526 - 353   | 1,93     | 1,468 to 2,392     | Yes | **** | <0,0001 | H-K |
| T- GSE16024 - 14 vs. N- GSE46510 - 154  | 0,4766   | 0,003562 to 0,9497 | Yes | *    | 0,0463  | H-L |
| T- GSE93291 -122 vs. N- GSE7307 - 504   | 1,827    | 1,656 to 1,998     | Yes | **** | <0,0001 | I-J |
| T- GSE93291 -122 vs. N- GSE3526 - 353   | 2,019    | 1,841 to 2,197     | Yes | **** | <0,0001 | I-K |
| T- GSE93291 -122 vs. N- GSE46510 - 154  | 0,5653   | 0,3599 to 0,7707   | Yes | **** | <0,0001 | I-L |
| N- GSE7307 - 504 vs. N- GSE3526 - 353   | 0,192    | 0,07434 to 0,3096  | Yes | **** | <0,0001 | J-K |
| N- GSE7307 - 504 vs. N- GSE46510 - 154  | -1,261   | -1,417 to -1,105   | Yes | **** | <0,0001 | J-L |
| N- GSE3526 - 353 vs. N- GSE46510 - 154  | -1,453   | -1,617 to -1,29    | Yes | **** | <0,0001 | K-L |

#### BIRC5 - MAS5,0 - u133p2

|                                  |      |
|----------------------------------|------|
| Number of families               | 1    |
| Number of comparisons per family | 66   |
| Alpha                            | 0,05 |

| Tukey's multiple comparisons test        | Mean Diff, | 95,00% CI of diff, | Significant ? | Summary | Adjusted P Value |     |
|------------------------------------------|------------|--------------------|---------------|---------|------------------|-----|
| T- GSE26673 - 16 vs. T- GSE132929 - 290  | 1,328      | 0,1828 to 2,473    | Yes           | **      | 0,0084           | A-B |
| T- GSE26673 - 16 vs. T- GSE10846 - 420   | 0,8255     | -0,3103 to 1,961   | No            | ns      | 0,4217           | A-C |
| T- GSE26673 - 16 vs. T- GSE56315 - 122   | 1,506      | 0,3205 to 2,692    | Yes           | **      | 0,002            | A-D |
| T- GSE26673 - 16 vs. T- GSE87371 - 223   | 1,628      | 0,4738 to 2,782    | Yes           | ***     | 0,0003           | A-E |
| T- GSE26673 - 16 vs. T- GSE81183 - 42    | 0,5335     | -0,7765 to 1,843   | No            | ns      | 0,9749           | A-F |
| T- GSE26673 - 16 vs. T- GSE93261 - 149   | 2,536      | 1,362 to 3,709     | Yes           | ****    | <0,0001          | A-G |
| T- GSE26673 - 16 vs. T- GSE16024 - 14    | 2,369      | 0,7374 to 4,001    | Yes           | ***     | 0,0001           | A-H |
| T- GSE26673 - 16 vs. T- GSE93291 -122    | 2,431      | 1,245 to 3,616     | Yes           | ****    | <0,0001          | A-I |
| T- GSE26673 - 16 vs. N- GSE7307 - 504    | 5,745      | 4,613 to 6,878     | Yes           | ****    | <0,0001          | A-J |
| T- GSE26673 - 16 vs. N- GSE3526 - 353    | 5,97       | 4,83 to 7,11       | Yes           | ****    | <0,0001          | A-K |
| T- GSE26673 - 16 vs. N- GSE46510 - 154   | 6,117      | 4,946 to 7,288     | Yes           | ****    | <0,0001          | A-L |
| T- GSE132929 - 290 vs. T- GSE10846 - 420 | -0,5024    | -0,8428 to -0,1619 | Yes           | ****    | <0,0001          | B-C |

|                                          |         |                    |     |      |         |     |
|------------------------------------------|---------|--------------------|-----|------|---------|-----|
| T- GSE132929 - 290 vs. T- GSE56315 - 122 | 0,1783  | -0,3029 to 0,6594  | No  | ns   | 0,9881  | B-D |
| T- GSE132929 - 290 vs. T- GSE87371 - 223 | 0,3     | -0,09713 to 0,6971 | No  | ns   | 0,3587  | B-E |
| T- GSE132929 - 290 vs. T- GSE81183 - 42  | -0,7944 | -1,531 to -0,05822 | Yes | *    | 0,0216  | B-F |
| T- GSE132929 - 290 vs. T- GSE93261 - 149 | 1,208   | 0,7583 to 1,657    | Yes | **** | <0,0001 | B-G |
| T- GSE132929 - 290 vs. T- GSE16024 - 14  | 1,041   | -0,1788 to 2,261   | No  | ns   | 0,1839  | B-H |
| T- GSE132929 - 290 vs. T- GSE93291 -122  | 1,103   | 0,6215 to 1,584    | Yes | **** | <0,0001 | B-I |
| T- GSE132929 - 290 vs. N- GSE7307 - 504  | 4,417   | 4,089 to 4,746     | Yes | **** | <0,0001 | B-J |
| T- GSE132929 - 290 vs. N- GSE3526 - 353  | 4,642   | 4,289 to 4,996     | Yes | **** | <0,0001 | B-K |
| T- GSE132929 - 290 vs. N- GSE46510 - 154 | 4,789   | 4,345 to 5,234     | Yes | **** | <0,0001 | B-L |
| T- GSE10846 - 420 vs. T- GSE56315 - 122  | 0,6806  | 0,222 to 1,139     | Yes | **** | <0,0001 | C-D |
| T- GSE10846 - 420 vs. T- GSE87371 - 223  | 0,8024  | 0,4329 to 1,172    | Yes | **** | <0,0001 | C-E |
| T- GSE10846 - 420 vs. T- GSE81183 - 42   | -0,292  | -1,014 to 0,4296   | No  | ns   | 0,9761  | C-F |
| T- GSE10846 - 420 vs. T- GSE93261 - 149  | 1,71    | 1,285 to 2,135     | Yes | **** | <0,0001 | C-G |
| T- GSE10846 - 420 vs. T- GSE16024 - 14   | 1,544   | 0,3323 to 2,755    | Yes | **   | 0,0019  | C-H |
| T- GSE10846 - 420 vs. T- GSE93291 -122   | 1,605   | 1,146 to 2,064     | Yes | **** | <0,0001 | C-I |
| T- GSE10846 - 420 vs. N- GSE7307 - 504   | 4,92    | 4,625 to 5,214     | Yes | **** | <0,0001 | C-J |
| T- GSE10846 - 420 vs. N- GSE3526 - 353   | 5,145   | 4,823 to 5,467     | Yes | **** | <0,0001 | C-K |
| T- GSE10846 - 420 vs. N- GSE46510 - 154  | 5,292   | 4,872 to 5,712     | Yes | **** | <0,0001 | C-L |
| T- GSE56315 - 122 vs. T- GSE87371 - 223  | 0,1218  | -0,3804 to 0,6239  | No  | ns   | 0,9997  | D-E |
| T- GSE56315 - 122 vs. T- GSE81183 - 42   | -0,9726 | -1,77 to -0,1749   | Yes | **   | 0,0039  | D-F |
| T- GSE56315 - 122 vs. T- GSE93261 - 149  | 1,029   | 0,485 to 1,574     | Yes | **** | <0,0001 | D-G |
| T- GSE56315 - 122 vs. T- GSE16024 - 14   | 0,8631  | -0,3951 to 2,121   | No  | ns   | 0,5175  | D-H |
| T- GSE56315 - 122 vs. T- GSE93291 -122   | 0,9244  | 0,3535 to 1,495    | Yes | **** | <0,0001 | D-I |
| T- GSE56315 - 122 vs. N- GSE7307 - 504   | 4,239   | 3,789 to 4,689     | Yes | **** | <0,0001 | D-J |
| T- GSE56315 - 122 vs. N- GSE3526 - 353   | 4,464   | 3,996 to 4,932     | Yes | **** | <0,0001 | D-K |
| T- GSE56315 - 122 vs. N- GSE46510 - 154  | 4,611   | 4,071 to 5,152     | Yes | **** | <0,0001 | D-L |
| T- GSE87371 - 223 vs. T- GSE81183 - 42   | -1,094  | -1,844 to -0,3444  | Yes | ***  | 0,0001  | E-F |
| T- GSE87371 - 223 vs. T- GSE93261 - 149  | 0,9077  | 0,4359 to 1,379    | Yes | **** | <0,0001 | E-G |
| T- GSE87371 - 223 vs. T- GSE16024 - 14   | 0,7413  | -0,4872 to 1,97    | No  | ns   | 0,7113  | E-H |
| T- GSE87371 - 223 vs. T- GSE93291 -122   | 0,8027  | 0,3006 to 1,305    | Yes | **** | <0,0001 | E-I |
| T- GSE87371 - 223 vs. N- GSE7307 - 504   | 4,117   | 3,759 to 4,476     | Yes | **** | <0,0001 | E-J |
| T- GSE87371 - 223 vs. N- GSE3526 - 353   | 4,342   | 3,961 to 4,724     | Yes | **** | <0,0001 | E-K |
| T- GSE87371 - 223 vs. N- GSE46510 - 154  | 4,489   | 4,022 to 4,957     | Yes | **** | <0,0001 | E-L |
| T- GSE81183 - 42 vs. T- GSE93261 - 149   | 2,002   | 1,223 to 2,781     | Yes | **** | <0,0001 | F-G |
| T- GSE81183 - 42 vs. T- GSE16024 - 14    | 1,836   | 0,4597 to 3,212    | Yes | ***  | 0,0008  | F-H |
| T- GSE81183 - 42 vs. T- GSE93291 -122    | 1,897   | 1,099 to 2,695     | Yes | **** | <0,0001 | F-I |
| T- GSE81183 - 42 vs. N- GSE7307 - 504    | 5,212   | 4,496 to 5,928     | Yes | **** | <0,0001 | F-J |
| T- GSE81183 - 42 vs. N- GSE3526 - 353    | 5,437   | 4,709 to 6,164     | Yes | **** | <0,0001 | F-K |
| T- GSE81183 - 42 vs. N- GSE46510 - 154   | 5,584   | 4,808 to 6,36      | Yes | **** | <0,0001 | F-L |
| T- GSE93261 - 149 vs. T- GSE16024 - 14   | -0,1664 | -1,413 to 1,08     | No  | ns   | >0,9999 | G-H |
| T- GSE93261 - 149 vs. T- GSE93291 -122   | -0,105  | -0,6494 to 0,4394  | No  | ns   | >0,9999 | G-I |
| T- GSE93261 - 149 vs. N- GSE7307 - 504   | 3,21    | 2,794 to 3,626     | Yes | **** | <0,0001 | G-J |
| T- GSE93261 - 149 vs. N- GSE3526 - 353   | 3,435   | 2,999 to 3,87      | Yes | **** | <0,0001 | G-K |
| T- GSE93261 - 149 vs. N- GSE46510 - 154  | 3,582   | 3,069 to 4,094     | Yes | **** | <0,0001 | G-L |
| T- GSE16024 - 14 vs. T- GSE93291 -122    | 0,06135 | -1,197 to 1,32     | No  | ns   | >0,9999 | H-I |
| T- GSE16024 - 14 vs. N- GSE7307 - 504    | 3,376   | 2,168 to 4,584     | Yes | **** | <0,0001 | H-J |
| T- GSE16024 - 14 vs. N- GSE3526 - 353    | 3,601   | 2,386 to 4,816     | Yes | **** | <0,0001 | H-K |

|                                        |        |                    |     |      |         |     |
|----------------------------------------|--------|--------------------|-----|------|---------|-----|
| T- GSE16024 - 14 vs. N- GSE46510 - 154 | 3,748  | 2,503 to 4,993     | Yes | **** | <0,0001 | H-L |
| T- GSE93291 -122 vs. N- GSE7307 - 504  | 3,315  | 2,865 to 3,765     | Yes | **** | <0,0001 | I-J |
| T- GSE93291 -122 vs. N- GSE3526 - 353  | 3,54   | 3,071 to 4,008     | Yes | **** | <0,0001 | I-K |
| T- GSE93291 -122 vs. N- GSE46510 - 154 | 3,687  | 3,146 to 4,227     | Yes | **** | <0,0001 | I-L |
| N- GSE7307 - 504 vs. N- GSE3526 - 353  | 0,2248 | -0,08469 to 0,5343 | No  | ns   | 0,4228  | J-K |
| N- GSE7307 - 504 vs. N- GSE46510 - 154 | 0,3718 | -0,03872 to 0,7824 | No  | ns   | 0,1203  | J-L |
| N- GSE3526 - 353 vs. N- GSE46510 - 154 | 0,1471 | -0,2836 to 0,5777  | No  | ns   | 0,994   | K-L |

#### YY1- MAS5,0 - u133a

|                                  |      |
|----------------------------------|------|
| Number of families               | 1    |
| Number of comparisons per family | 10   |
| Alpha                            | 0,05 |

| Tukey's multiple comparisons test      | Mean Diff, | 95,00% CI of diff, | Significant ? | Summary | Adjusted P Value |     |
|----------------------------------------|------------|--------------------|---------------|---------|------------------|-----|
| T- GSE4475 - 215 vs. T- GSE10172 - 36  | 0,1021     | -0,1452 to 0,3493  | No            | ns      | 0,791            | A-B |
| T- GSE4475 - 215 vs. T- GSE57611 - 148 | 0,1434     | -0,003301 to 0,29  | No            | ns      | 0,059            | A-C |
| T- GSE4475 - 215 vs. N- GSE1133 - 158  | 1,651      | 1,507 to 1,795     | Yes           | ****    | <0,0001          | A-D |
| T- GSE4475 - 215 vs. N- GSE3846 - 108  | 1,191      | 1,03 to 1,353      | Yes           | ****    | <0,0001          | A-E |
| T- GSE10172 - 36 vs. T- GSE57611 - 148 | 0,04126    | -0,2139 to 0,2964  | No            | ns      | 0,9921           | B-C |
| T- GSE10172 - 36 vs. N- GSE1133 - 158  | 1,549      | 1,295 to 1,802     | Yes           | ****    | <0,0001          | B-D |
| T- GSE10172 - 36 vs. N- GSE3846 - 108  | 1,089      | 0,8251 to 1,354    | Yes           | ****    | <0,0001          | B-E |
| T- GSE57611 - 148 vs. N- GSE1133 - 158 | 1,508      | 1,35 to 1,665      | Yes           | ****    | <0,0001          | C-D |
| T- GSE57611 - 148 vs. N- GSE3846 - 108 | 1,048      | 0,8743 to 1,222    | Yes           | ****    | <0,0001          | C-E |
| N- GSE1133 - 158 vs. N- GSE3846 - 108  | -0,4594    | -0,6309 to -0,288  | Yes           | ****    | <0,0001          | D-E |

#### BIRC5 - MAS5,0 - u133a

|                                  |      |
|----------------------------------|------|
| Number of families               | 1    |
| Number of comparisons per family | 10   |
| Alpha                            | 0,05 |

| Tukey's multiple comparisons test      | Mean Diff, | 95,00% CI of diff, | Significant ? | Summary | Adjusted P Value |     |
|----------------------------------------|------------|--------------------|---------------|---------|------------------|-----|
| T- GSE4475 - 215 vs. T- GSE10172 - 36  | -0,3584    | -0,9401 to 0,2233  | No            | ns      | 0,4438           | A-B |
| T- GSE4475 - 215 vs. T- GSE57611 - 148 | 0,2598     | -0,08518 to 0,6049 | No            | ns      | 0,2389           | A-C |
| T- GSE4475 - 215 vs. N- GSE1133 - 158  | 2,354      | 2,015 to 2,692     | Yes           | ****    | <0,0001          | A-D |
| T- GSE4475 - 215 vs. N- GSE3846 - 108  | 3,158      | 2,777 to 3,539     | Yes           | ****    | <0,0001          | A-E |
| T- GSE10172 - 36 vs. T- GSE57611 - 148 | 0,6182     | 0,01792 to 1,219   | Yes           | *       | 0,0399           | B-C |
| T- GSE10172 - 36 vs. N- GSE1133 - 158  | 2,712      | 2,116 to 3,309     | Yes           | ****    | <0,0001          | B-D |
| T- GSE10172 - 36 vs. N- GSE3846 - 108  | 3,516      | 2,895 to 4,138     | Yes           | ****    | <0,0001          | B-E |
| T- GSE57611 - 148 vs. N- GSE1133 - 158 | 2,094      | 1,725 to 2,464     | Yes           | ****    | <0,0001          | C-D |
| T- GSE57611 - 148 vs. N- GSE3846 - 108 | 2,898      | 2,489 to 3,307     | Yes           | ****    | <0,0001          | C-E |
| N- GSE1133 - 158 vs. N- GSE3846 - 108  | 0,8039     | 0,4006 to 1,207    | Yes           | ****    | <0,0001          | D-E |

**Table S4.** Contingency tables relative to the Fisher's and ROC analyses

| <b>Hummel (GSE4475)</b>   |          |            |       |
|---------------------------|----------|------------|-------|
| Data analyzed             | non-MBL  | MBL        | Total |
| YY1 High                  | 80       | 37         | 117   |
| YY1 Low                   | 91       | 7          | 98    |
| Total                     | 171      | 44         | 215   |
| Data analyzed             | non-MBL  | MBL        | Total |
| BIRC5 High                | 63       | 41         | 104   |
| BIRC5 Low                 | 108      | 3          | 111   |
| Total                     | 171      | 44         | 215   |
| <b>Siebert (GSE10172)</b> |          |            |       |
| Data analyzed             | non-BL   | BL         | Total |
| YY1 High                  | 5        | 16         | 21    |
| YY1 Low                   | 11       | 4          | 15    |
| Total                     | 16       | 20         | 36    |
| Data analyzed             | non-BL   | BL         | Total |
| BIRC5 High                | 4        | 14         | 18    |
| BIRC5 Low                 | 12       | 6          | 18    |
| Total                     | 16       | 20         | 36    |
| <b>Green (GSE132929)</b>  |          |            |       |
| Data analyzed             | Indolent | Aggressive | Total |
| YY1 High                  | 55       | 102        | 157   |
| YY1 Low                   | 76       | 56         | 132   |
| Total                     | 131      | 158        | 289   |
| Data analyzed             | Indolent | Aggressive | Total |
| BIRC5 High                | 29       | 126        | 155   |
| BIRC5 Low                 | 102      | 32         | 134   |
| Total                     | 131      | 158        | 289   |
